# Supplementary material for: Succinct Amyloid and Nonamyloid Patterns in Hexapeptides
Source: PubMed Central journal article supplement (PMC9558248; doi:10.1021/acsomega.2c02513), 2022-09-27
Supplement: ao2c02513_si_001.pdf [file ao2c02513_si_001.pdf]

# Supporting Material for the Article: Succinct Amyloid and Non-Amyloid Patterns in Hexapeptides

László Keresztes<sup>a,\*\*</sup>, Evelin Szögi<sup>a,\*\*</sup>, Bálint Varga<sup>a</sup>, Viktor Farkas<sup>c</sup>, András Perczel<sup>c,d</sup>, Vince Grolmusz<sup>a,b,\*</sup>

<sup>a</sup>*PIT Bioinformatics Group, Eötvös University, H-1117 Budapest, Hungary*

<sup>b</sup>*Uratim Ltd., H-1118 Budapest, Hungary*

<sup>c</sup>*MTA-ELTE Protein Modeling Research Group, H-1117 Budapest, Hungary*

<sup>d</sup>*Laboratory of Structural Chemistry and Biology, Eötvös University, H-1117, Budapest, Hungary*

**Table S1: Amyloid patterns in hexapeptides**

In the table we list all the existing minimal patterns of amyloid-forming hexapeptides, computed from the SVM model of the Budapest Amyloid Predictor. Each pattern in the Table contains two free “x” positions, where any amino acids can be substituted, and the resulting hexapeptide is predicted to be amyloidogenic. Since the two free positions can be substituted  $20 \times 20 = 400$  ways, each of the 5531 patterns in the Table describes 400 hexapeptides succinctly.

| 0      | 1      | 2      | 3      | 4      | 5      | 6      | 7       | 8      | 9      |
|--------|--------|--------|--------|--------|--------|--------|---------|--------|--------|
| VIIVxx | VIIIxx | VIILxx | VIIFxx | VIIcxx | VIIWxx | VIIYxx | VIIImxx | VIIAxx | VIVVxx |
| VIVIxx | VIVLxx | VIVFxx | VIVcxx | VIVWxx | VIVYxx | VIVFxx | VIFIxx  | VICVxx | VICLxx |
| VILVxx | VILLxx | VIMVxx | VFIVxx | VFILxx | VFILxx | VFIFxx | VFICxx  | VFIWxx | VFIYxx |
| VFIMxx | VFVVxx | VFVLxx | VFVLxx | VFVFxx | VFVCxx | VFFVxx | VFFIxx  | VFCVxx | VFLVxx |
| VYIVxx | VYIIxx | VYILxx | VYIFxx | VYICxx | VYIWxx | VYIYxx | VYIMxx  | VYVVxx | VYVIxx |
| VYVLxx | VYVFxx | VYVCxx | VYFVxx | VYFIxx | VYCVxx | VYLVxx | VVIVxx  | VVILxx | VVILxx |
| VVIFxx | VVICxx | VVIWxx | VVIYxx | VVVVxx | VVVIxx | VVVLxx | VVVFxx  | VVFXxx | VVCVxx |
| VVLVxx | VWIVxx | VWILxx | VWILxx | VWIFxx | VWICxx | VWIVxx | VWYVxx  | VWVVxx | VWVx   |
| VWVLxx | VLIVxx | VLIIxx | VLILxx | VLIFxx | VLICxx | VLVVxx | VLVIxx  | VLVLxx | VCIVxx |
| VCIIxx | VCILxx | VCVVxx | VCVIxx | VCVLxx | VMIVxx | VMIx   | VMLx    | VMVVxx | VMVIxx |
| VHIVxx | VHIIxx | VHILxx | VHVVxx | VHVIxx | VQIVxx | VQIIxx | VQVVxx  | VAIVxx | VAILxx |
| VTIVxx | VTIIxx | VNIVxx | VSIVxx | VGIVxx | IIIVxx | IIIIxx | IIILxx  | IIIFxx | IIICxx |
| IIIVxx | IIIVxx | IIIMxx | IIIAxx | IIVVxx | IIVLxx | IIVLxx | IIVFxx  | IIVCxx | IIVWxx |
| IIVYxx | IIFVxx | IIFLxx | IICVxx | IICIxx | IILVxx | IILx   | IIMVxx  | IFIVxx | IFIIxx |
| IFILxx | IFIFxx | IFICxx | IFIWxx | IFIYxx | IFIMxx | IFVVxx | IFVIxx  | IFVLxx | IFVFxx |
| IFFVxx | IFCVxx | IFLVxx | IYIVxx | IYILxx | IYILxx | IYIFxx | IYICxx  | IYIWxx | IYIYxx |
| IYIMxx | IYVVxx | IYVLxx | IYVLxx | IYVFxx | IYFVxx | IYCVxx | IYLVxx  | IVIVxx | IVIIxx |
| IVILxx | IVIFxx | IVICxx | IVIWxx | IVIYxx | IVVVxx | IVVIxx | IVVLxx  | IVFVxx | IVCVxx |
| IWIVxx | IWILxx | IWILxx | IWIFxx | IWICxx | IWVVxx | IWVIxx | IWVLxx  | ILIVxx | ILIIxx |
| ILILxx | ILIFxx | ILVVxx | ILVIxx | ILVLxx | ICIVxx | ICIIxx | ICILxx  | ICVx   | ICVIxx |
| IMIVxx | IMIIxx | IMILxx | IMVVxx | IHIVxx | IHIx   | IHILxx | IHVx    | IQIVxx | IQIIxx |
| IQVVxx | IAIVxx | ITIVxx | INIVxx | ISIVxx | CIIVxx | CIIIxx | CIILxx  | CIIFxx | CIICxx |

\*Corresponding author

\*\*Joint first authors



|        |        |        |        |        |        |        |        |        |        |
|--------|--------|--------|--------|--------|--------|--------|--------|--------|--------|
| VxVCCx | VxVCYx | VxVCMx | VxVCVx | VxVCLx | VxVVIx | VxVWx  | VxVWFx | VxVVCx | VxVVYx |
| VxVVMx | VxVWVx | VxVWLx | VxVYIx | VxVYVx | VxVYFx | VxVYCx | VxVYYx | VxVYMx | VxVYVx |
| VxVYLx | VxVMIx | VxVMWx | VxVMFx | VxVMCx | VxVMYx | VxVMMx | VxVMVx | VxVMLx | VxVAIx |
| VxVAWx | VxVAFx | VxVACx | VxVAYx | VxVTIx | VxFVIx | VxFVWx | VxFVFx | VxFVCx | VxFVYx |
| VxFVMx | VxFVx  | VxFLx  | VxFVGx | VxFIIX | VxFIWx | VxFIFx | VxFICx | VxFIYx | VxFIMx |
| VxFIVx | VxFILx | VxFILx | VxFLWx | VxFLFx | VxFLCx | VxFLYx | VxFLMx | VxFLVx | VxFFIx |
| VxFFWx | VxFFFx | VxFCIx | VxFCWx | VxFWx  | VxFWx  | VxFYIx | VxFYWx | VxFMIx | VxCVIx |
| VxCVWx | VxCVFx | VxCVCx | VxCVYx | VxCVMx | VxCVVx | VxCVLx | VxCVGx | VxCIIx | VxCIVx |
| VxCIFx | VxCICx | VxCIXx | VxCIMx | VxCIVx | VxCILx | VxCILx | VxCLWx | VxCLFx | VxCLCx |
| VxCLYx | VxCLMx | VxCLVx | VxCFIx | VxCFWx | VxCCIx | VxCCWx | VxCWIx | VxCYIx | VxLVIx |
| VxLVWx | VxLVFx | VxLVCx | VxLVYx | VxLVMx | VxLVVx | VxLVLx | VxLIIx | VxLIWx | VxLIFx |
| VxLICx | VxLIYx | VxLIMx | VxLIVx | VxLILx | VxLLIx | VxLLWx | VxLLFx | VxLLCx | VxLLYx |
| VxLFIx | VxLFWx | VxLCIx | VxLWIx | VxLYIx | VxMVIx | VxMVWx | VxMVFx | VxMVCx | VxMVYx |
| VxMVMx | VxMVVx | VxMVLx | VxMIIX | VxMIWx | VxMIFx | VxMICx | VxMIYx | VxMIMx | VxMIVx |
| VxMLIx | VxMLWx | VxMLFx | VxMFIx | VxWVIx | VxWVWx | VxWVFx | VxWVCx | VxWVYx | VxWIIx |
| VxWIWx | VxWLIx | VxYVIx | VxYVWx | VxYVFx | VxYIIX | IxIVIx | IxIVWx | IxIVFx | IxIVCx |
| IxIVYx | IxIVMx | IxIVVx | IxIVLx | IxIVGx | IxIVHx | IxIVTx | IxIVPx | IxIVAx | IxIVNx |
| IxIVQx | IxIVSx | IxIIX  | IxIIXx | IxIIFx | IxIICx | IxIIXx | IxIIMx | IxIIVx | IxIILx |
| IxIIGx | IxIIHx | IxIITx | IxIIPx | IxIIAx | IxIINx | IxILIx | IxILWx | IxILFx | IxILCx |
| IxILYx | IxILMx | IxILVx | IxILLx | IxILGx | IxILHx | IxILTx | IxILPx | IxILAx | IxILNx |
| IxIFCx | IxIFYx | IxIFMx | IxIFVx | IxIFLx | IxIFGx | IxICIx | IxICWx | IxICFx | IxICCx |
| IxICYx | IxICMx | IxICVx | IxICLx | IxICGx | IxIWIx | IxIWXx | IxIWFx | IxIWCx | IxIWXx |
| IxIWMx | IxIWXx | IxIWLx | IxIWGx | IxIYIx | IxIYFx | IxIYCx | IxIYVx | IxIYAx | IxIYNx |
| IxIYVx | IxIYLx | IxIYGx | IxIMIx | IxIMWx | IxIMFx | IxIMCx | IxIMYx | IxIMMx | IxIMVx |
| IxIMLx | IxIAIx | IxIAWx | IxIAFx | IxIACx | IxIAXx | IxIAMx | IxIAVx | IxIALx | IxITIx |
| IxITWx | IxITFx | IxINIx | IxIHx  | IxIELx | IxISIx | IxVVIx | IxVWx  | IxVVFx | IxVVCx |
| IxVVYx | IxVVMx | IxVVVx | IxVVLx | IxVVGx | IxVVHx | IxVVTx | IxVVPx | IxVVAx | IxVIIx |
| IxVIWx | IxVIFx | IxVICx | IxVIYx | IxVIMx | IxVIVx | IxVILx | IxVIGx | IxVIHx | IxVITx |
| IxVLIx | IxVLWx | IxVLFx | IxVLCx | IxVLYx | IxVLMx | IxVLVx | IxVLLx | IxVLGx | IxVLHx |
| IxVFIx | IxVFXx | IxVFFx | IxVFCx | IxVFXx | IxVFMx | IxVFXx | IxVFLx | IxVCIx | IxVWCx |
| IxVCFx | IxVCCx | IxVCYx | IxVCMx | IxVCVx | IxVCLx | IxVVIx | IxVWx  | IxVWFx | IxVWCx |
| IxVWYx | IxVWMx | IxVWVx | IxVWLx | IxVYIx | IxVYFx | IxVYCx | IxVYVx | IxVYAx | IxVYNx |
| IxVYVx | IxVYLx | IxVMIx | IxVMWx | IxVMFx | IxVMCx | IxVMYx | IxVMMx | IxVMVx | IxVAIx |
| IxVAWx | IxVAFx | IxVTIx | IxFVIx | IxFVWx | IxFVFx | IxFVCx | IxFVYx | IxFVMx | IxFVVx |
| IxFVLx | IxFVx  | IxFILx | IxFIIX | IxFIWx | IxFIFx | IxFICx | IxFIYx | IxFIMx | IxFILx |
| IxFLIx | IxFLWx | IxFLFx | IxFLCx | IxFLYx | IxFLMx | IxFLVx | IxFFIx | IxFFWx | IxFCIx |
| IxFCWx | IxFWx  | IxFYIx | IxFMIx | IxCVIx | IxCVWx | IxCVFx | IxCVCx | IxCVYx | IxCVMx |
| IxCVWx | IxCVLx | IxCIIx | IxCIXx | IxCIFx | IxCICx | IxCIXx | IxCIMx | IxCIVx | IxCILx |
| IxCLIx | IxCLWx | IxCLFx | IxCLCx | IxCLYx | IxCFIx | IxCFWx | IxCCIx | IxCWIX | IxCYIx |
| IxLVIx | IxLVWx | IxLVFx | IxLVCx | IxLVYx | IxLVMx | IxLVVx | IxLVLx | IxLIIx | IxLWIX |
| IxLFIx | IxLFXx | IxLIXx | IxLIMx | IxLIVx | IxLILx | IxLLIx | IxLLWx | IxLLFx | IxLLCx |
| IxLFIx | IxLCIx | IxLWIX | IxLYIx | IxMVIx | IxMVWx | IxMVFx | IxMVCx | IxMVYx | IxMVMx |
| IxMVIx | IxMVLx | IxMIIx | IxMIIX | IxMIFx | IxMICx | IxMIYx | IxMLIx | IxMLWx | IxMVIx |
| IxMVMx | IxMVFx | IxWIIx | IxWIIX | IxYVIx | IxYVWx | IxYVx  | CxIVIx | CxIVWx | CxIVFx |
| CxIVCx | CxIVYx | CxIVMx | CxIVVx | CxIVLx | CxIVGx | CxIVHx | CxIVTx | CxIVPx | CxIVAx |
| CxIVNx | CxIVQx | CxIVSx | CxIIIx | CxIIXx | CxIIFx | CxIICx | CxIIXx | CxIIMx | CxIIVx |
| CxIILx | CxIIGx | CxIIHx | CxIITx | CxIIPx | CxIIAx | CxILIx | CxILWx | CxILFx | CxILCx |
| CxILYx | CxILMx | CxILVx | CxILLx | CxILGx | CxILHx | CxIFIx | CxIFWx | CxIFFx | CxIFCx |
| CxIFYx | CxIFMx | CxIFVx | CxIFLx | CxIFGx | CxICIx | CxICWx | CxICFx | CxICCx | CxICYx |
| CxICMx | CxICVx | CxICLx | CxICGx | CxIWIx | CxIWXx | CxIWFx | CxIWCx | CxIWXx | CxIWMx |
| CxIWXx | CxIWLx | CxIYIx | CxIYFx | CxIYCx | CxIYYx | CxIYMx | CxIYVx | CxIYLx | CxIYNx |
| CxIMIx | CxIMWx | CxIMFx | CxIMCx | CxIMYx | CxIMMx | CxIMVx | CxIMLx | CxIAIx | CxIAWx |
| CxIAFx | CxIACx | CxIAXx | CxIAMx | CxIAVx | CxITIx | CxINIx | CxVVIx | CxVVWx | CxVVFx |
| CxVVCx | CxVVYx | CxVVMx | CxVVVx | CxVVLx | CxVVGx | CxVVHx | CxVVTx | CxVVPx | CxVIIx |
| CxVIWx | CxVIFx | CxVICx | CxVIYx | CxVIMx | CxVIVx | CxVILx | CxVIGx | CxVIHx | CxVITx |
| CxVLWx | CxVLFx | CxVLCx | CxVLYx | CxVLMx | CxVLVx | CxVLLx | CxVLGx | CxVFIx | CxVFWx |
| CxVFFx | CxVFCx | CxVFXx | CxVFMx | CxVFXx | CxVFLx | CxVCIx | CxVCWx | CxVCFx | CxVCCx |
| CxVCYx | CxVCMx | CxVCVx | CxVCLx | CxVWLx | CxVWx  | CxVWFx | CxVWCx | CxVWYx | CxVWMx |
| CxVWVx | CxVWLx | CxVYIx | CxVYVx | CxVYFx | CxVYCx | CxVYVx | CxVYMx | CxVYVx | CxVMIx |
| CxVMWx | CxVMFx | CxVMCx | CxVMYx | CxVALx | CxVAWx | CxVAFx | CxFVIX | CxFVMx | CxFVFx |
| CxFVCx | CxFVx  | CxFILx | CxFIIX | CxFIWx | CxFIFx | CxFICx | CxFIYx | CxFIMx | CxFILx |
| CxFIMx | CxFIVx | CxFILx | CxFIIX | CxFIIX | CxFIIX | CxFIIX | CxFFIx | CxFFIx | CxFIIX |
| CxFYIx | CxCVIx | CxCVWx | CxCVFx | CxCVCx | CxCVYx | CxCVMx | CxCVVx | CxCVLx | CxCIIx |
| CxCIVx | CxCIFx | CxCICx | CxCIXx | CxCIMx | CxCIVx | CxCILx | CxCILx | CxCILx | CxCIFx |
| CxCCIx | CxLVIx | CxLVWx | CxLVFx | CxLVCx | CxLVYx | CxLVMx | CxLVVx | CxLVLx | CxLIIx |
| CxLFIx | CxLIFx | CxLICx | CxLIYx | CxLIMx | CxLIVx | CxLLIx | CxLLWx | CxLLFx | CxLFIx |
| CxMVIx | CxMVWx | CxMVFx | CxMVCx | CxMVYx | CxMVMx | CxMVVx | CxMVIx | CxMIFx | CxMIFx |
| CxMLIx | CxWVIx | CxWVWx | CxWVFx | CxWIIx | CxYVIx | LxIVIx | LxIVWx | LxIVFx | LxIVCx |

|        |        |        |        |        |        |        |        |        |        |
|--------|--------|--------|--------|--------|--------|--------|--------|--------|--------|
| LxIVYx | LxIVMx | LxIVVx | LxIVLx | LxIVGx | LxIVHx | LxIVTx | LxIVPx | LxIVAx | LxIVNx |
| LxIVQx | LxIIIx | LxIIXx | LxIIFx | LxIICx | LxIIXx | LxIIMx | LxIIVx | LxIILx | LxIIGx |
| LxIIHx | LxIITx | LxIIPx | LxIIAx | LxIILx | LxILWx | LxILFx | LxILCx | LxILYx | LxILMx |
| LxILVx | LxILLx | LxILGx | LxILHx | LxIFIx | LxIFWx | LxIFFx | LxIFCx | LxIFYx | LxIFMx |
| LxIFVx | LxIFLx | LxIFGx | LxICIx | LxICWx | LxICFx | LxICCx | LxICYx | LxICMx | LxICVx |
| LxICLx | LxIWLx | LxIWWx | LxIWFx | LxIWCx | LxIWyx | LxIWMx | LxIWXx | LxIWLx | LxIYIx |
| LxIYWx | LxIYFx | LxIYCx | LxIYYx | LxIYMx | LxIYVx | LxIYLx | LxIMIx | LxIMWx | LxIMFx |
| LxIMCx | LxIMYx | LxIMMx | LxIMVx | LxIMLx | LxIAIx | LxIAWx | LxIAFx | LxIACx | LxIAYx |
| LxIAMx | LxIAVx | LxITIx | LxINIx | LxVVIx | LxVVWx | LxVVFx | LxVVCx | LxVVYx | LxVVMx |
| LxVVVx | LxVVLx | LxVVGx | LxVVHx | LxVVTx | LxVIIx | LxVIWx | LxVIFx | LxVICx | LxVIYx |
| LxVIMx | LxVILx | LxVIGx | LxVIHx | LxVLIx | LxVLIx | LxVLWx | LxVLFx | LxVLCx | LxVLYx |
| LxVLMx | LxVLVx | LxVLLx | LxVLGx | LxVFLx | LxVFWx | LxVFFx | LxVFCx | LxVFXx | LxVFMx |
| LxVFXx | LxVFLx | LxVCIx | LxVCWx | LxVCFx | LxVCCx | LxVCYx | LxVCMx | LxVCVx | LxVCLx |
| LxVWXx | LxVWWx | LxVWFx | LxVWCx | LxVWYx | LxVWMx | LxVWVx | LxVYIx | LxVYVx | LxVYFx |
| LxVYCx | LxVYYx | LxVYMx | LxVYVx | LxVMLx | LxVMWx | LxVMFx | LxVMCx | LxVAIx | LxVAWx |
| LxFVIX | LxFVWx | LxFVFX | LxFVCx | LxFVYx | LxFVMx | LxFVVx | LxFVLx | LxFIIX | LxFIWX |
| LxFIFx | LxFICx | LxFIYx | LxFIMx | LxFIVx | LxFILx | LxFILx | LxFILx | LxFILx | LxFIIX |
| LxFCLx | LxFWLx | LxFYIx | LxCVIX | LxCVWx | LxCVFX | LxCVCx | LxCVYx | LxCVMx | LxCVVx |
| LxCVLx | LxCIIx | LxCIWx | LxCIFx | LxCICx | LxCIYx | LxCIMx | LxCIVx | LxCLIX | LxCLWX |
| LxCLFx | LxCFIx | LxCCIx | LxLVIx | LxLVWx | LxLVFx | LxLVCx | LxLVYx | LxLVMx | LxLVVx |
| LxLVLx | LxLIIx | LxLIWx | LxLIFx | LxLICx | LxLIYx | LxLIMx | LxLIVx | LxLLIX | LxLLWX |
| LxLLFx | LxLFIx | LxMVIx | LxMVWx | LxMVFx | LxMVCx | LxMVYx | LxMVMx | LxMVIx | LxMIIx |
| LxMIFx | LxMIFx | LxMLIX | LxWVIx | LxWVWx | LxWVIX | LxVYIx | FxIVIX | FxIVVx | FxIVFx |
| FxIVCx | FxIVYx | FxIVMx | FxIVVx | FxIVLx | FxIVGx | FxIVHx | FxIVTx | FxIVPx | FxIVAx |
| FxIIIX | FxIIWx | FxIIFx | FxIICx | FxIIYx | FxIIMx | FxIIVx | FxIILx | FxIIGx | FxIIHx |
| FxIITx | FxILLx | FxILLx | FxILFx | FxILCx | FxILYx | FxILMx | FxILLx | FxILLx | FxILGx |
| FxIFLx | FxIFWx | FxIFFx | FxIFCx | FxIFYx | FxIFMx | FxIFVx | FxIFLx | FxICIX | FxICWx |
| FxICFx | FxICCx | FxICYx | FxICMx | FxICVx | FxICLx | FxIWIx | FxIWXx | FxIWFx | FxIWCx |
| FxIYVx | FxIWMx | FxIWXx | FxIWLx | FxIYIx | FxIYWx | FxIYFx | FxIYCx | FxIYYx | FxIYMx |
| FxIAWx | FxIAFx | FxIITx | FxVVIx | FxVWx  | FxVVFx | FxVVCx | FxVVYx | FxVVMx | FxVVVx |
| FxVVLx | FxVVGx | FxVWHx | FxVIXx | FxVIWx | FxVIFx | FxVICx | FxVIYx | FxVIMx | FxVIVx |
| FxVILx | FxVIGx | FxVLIx | FxVLWx | FxVLFx | FxVLCx | FxVLYx | FxVLMx | FxVLVx | FxVLLx |
| FxVFIx | FxVFWx | FxVFFx | FxVFCx | FxVFYx | FxVFMx | FxVFXx | FxVCIx | FxVCWx | FxVCFx |
| FxVCCx | FxVCYx | FxVCMx | FxVVCx | FxVWLx | FxVWVx | FxVWFx | FxVWCx | FxVYIx | FxVYVx |
| FxVYCx | FxVYFx | FxVYMx | FxVYVx | FxVMLx | FxVMWx | FxVMFx | FxVAIx | FxFVIX | FxFVWX |
| FxVFXx | FxVFCx | FxFVYx | FxFVMx | FxFVWx | FxFVLx | FxFIIX | FxFIWX | FxFIFx | FxFICx |
| FxFIYx | FxFIMx | FxFIVx | FxFILx | FxFILx | FxFILx | FxFIIX | FxCVIX | FxCVFX | FxCVFX |
| FxCVCx | FxCVYx | FxCVMx | FxCVVx | FxCVLx | FxCIIx | FxCIWx | FxCIFx | FxCICx | FxCLIX |
| FxCLWx | FxLVIx | FxLVWx | FxLVFx | FxLVCx | FxLVYx | FxLVMx | FxLVVx | FxLIIx | FxLIWX |
| FxLLIx | FxLLIx | FxMVIx | FxMVWx | FxMVFx | FxMVCx | FxMIWx | FxMWIx | FxMVIx | FxMIIx |
| MxIVFx | MxIVCx | MxIVYx | MxIVMx | MxIVVx | MxIVLx | MxIVGx | MxIVHx | MxIVTx | MxIIXx |
| MxIIWx | MxIIFx | MxIICx | MxIIYx | MxIIMx | MxIIVx | MxIILx | MxIIGx | MxIIHx | MxIIXx |
| MxILWx | MxILFx | MxILCx | MxILYx | MxILMx | MxILVx | MxILLx | MxILGx | MxIFIx | MxIFWx |
| MxIFFx | MxIFCx | MxIFYx | MxIFMx | MxIFVx | MxIFLx | MxICIX | MxICWx | MxICFx | MxICCx |
| MxICYx | MxICMx | MxICVx | MxICLx | MxIWIx | MxIWXx | MxIWFx | MxIWCx | MxIYIx | MxIWMx |
| MxIWXx | MxIYIx | MxIYWx | MxIYFx | MxIYCx | MxIYYx | MxIYMx | MxIYVx | MxIMIx | MxIMWx |
| MxIMFx | MxIAIx | MxIAWx | MxVVIx | MxVWx  | MxVVFx | MxVVCx | MxVVYx | MxVVMx | MxVVVx |
| MxVVLx | MxVVGx | MxVWHx | MxVIIx | MxVIWx | MxVIFx | MxVICx | MxVIYx | MxVIMx | MxVIVx |
| MxVILx | MxVIGx | MxVLIx | MxVLWx | MxVLFx | MxVLCx | MxVLYx | MxVLMx | MxVLVx | MxVLLx |
| MxVFLx | MxVFWx | MxVFFx | MxVFCx | MxVCLx | MxVCMx | MxVCFx | MxVWLx | MxVWVx | MxVWFx |
| MxVYIx | MxVYWx | MxVYFx | MxVMIx | MxFVIX | MxFVWx | MxFVFX | MxFVIX | MxFVYx | MxFVMx |
| MxFVXx | MxFIIX | MxFIWX | MxFIFx | MxFILx | MxCVIX | MxCVWx | MxCVFX | MxCVCx | MxCVYx |
| MxCIIX | MxCIWx | MxCIFx | MxCLIX | MxLVIx | MxLVWx | MxLVFx | MxLVCx | MxLIIx | MxLIWX |
| MxLLIx | MxMVIx | MxMVWx | MxMIFx | MxWVIx | MxWVWx | MxWVIX | MxWVIX | MxIVFx | MxIVYx |
| WxIVMx | WxIVVx | WxIVLx | WxIVGx | WxIVHx | WxIVTx | WxIIIX | WxIIWx | WxIIFx | WxIICx |
| WxIIXx | WxIIMx | WxIIVx | WxIILx | WxIIGx | WxIIHx | WxILIX | WxILWx | WxILFx | WxILCx |
| WxILYx | WxILLx | WxILVx | WxILLx | WxILGx | WxIFIx | WxIFWx | WxIFFx | WxIFCx | WxIFYx |
| WxIFMx | WxIFVx | WxIFLx | WxICIX | WxICWx | WxICFx | WxICCx | WxICYx | WxICMx | WxICVx |
| WxICLx | WxIWLx | WxIWWx | WxIWFx | WxIWCx | WxIYIx | WxIWMx | WxIWXx | WxIYIx | WxIYWx |
| WxIYFx | WxIYCx | WxIYYx | WxIYMx | WxIYVx | WxIMIx | WxIMWx | WxIMFx | WxIAIx | WxIAWx |
| WxVVIx | WxVVWx | WxVVFx | WxVVCx | WxVVYx | WxVVMx | WxVVVx | WxVVLx | WxVVGx | WxVWHx |
| WxVIXx | WxVIWx | WxVIFx | WxVICx | WxVIYx | WxVIMx | WxVIVx | WxVILx | WxVIGx | WxVLIx |
| WxVLMx | WxVLFx | WxVLCx | WxVLYx | WxVLMx | WxVLLx | WxVFLx | WxVFXx | WxVFXx | WxVFXx |
| WxVFCx | WxVCIx | WxVCWx | WxVCFx | WxVWIX | WxVWVx | WxVWFx | WxVYIx | WxVYWx | WxVYFx |
| WxVMIx | WxVFLx | WxFVWx | WxFVFX | WxFVCx | WxFVYx | WxFVMx | WxFVWx | WxFIIX | WxFIWX |
| WxFIFx | WxFILx | WxCVIX | WxCVWx | WxCVFX | WxCVCx | WxCVYx | WxCIIX | WxCIWX | WxCIFx |
| WxCLIX | WxLVIx | WxLVWx | WxLVFx | WxLVCx | WxLIIx | WxLIWx | WxLLIX | WxMVIx | WxMVWx |









---

|        |        |        |        |        |        |        |        |        |        |
|--------|--------|--------|--------|--------|--------|--------|--------|--------|--------|
| xxICCV | xxICCC | xxICCI | xxICCF | xxICVY | xxICYC | xxICYI | xxICMV | xxICMC | xxICMI |
| xxICVV | xxICVC | xxICVI | xxICLV | xxICLC | xxIWIV | xxIWIC | xxIWII | xxIWIF | xxIWIL |
| xxIWYI | xxIWIW | xxIWIM | xxIWWV | xxIWWC | xxIWWI | xxIWWF | xxIWWL | xxIWWY | xxIWFV |
| xxIWFC | xxIWFI | xxIWFF | xxIWCV | xxIWCC | xxIWCI | xxIWYV | xxIWYC | xxIWYI | xxIWMV |
| xxIWMC | xxIWMI | xxIWWV | xxIWVC | xxIWVI | xxIWLW | xxIWLC | xxIYIV | xxIYIC | xxIYII |
| xxIYIF | xxIYIL | xxIYIY | xxIYIW | xxIYIM | xxIYVW | xxIYWC | xxIYWI | xxIYWF | xxIYWL |
| xxIYWY | xxIYFV | xxIYFC | xxIYFI | xxIYFF | xxIYCV | xxIYCC | xxIYCI | xxIYVY | xxIYYC |
| xxIYYI | xxIYMV | xxIYMC | xxIYMI | xxIYVY | xxIYVC | xxIYLV | xxIYLC | xxIMIV | xxIMIC |
| xxIMII | xxIMIF | xxIMIL | xxIMIY | xxIMIW | xxIMWV | xxIMWC | xxIMWI | xxIMWF | xxIMFV |
| xxIMFC | xxIMFI | xxIMCV | xxIMCC | xxIMVY | xxIMYC | xxIMMV | xxIMVY | xxIMLV | xxIAIV |
| xxIAIC | xxIAII | xxIAIF | xxIAWV | xxIAWC | xxIAFV | xxIAFC | xxIACV | xxIAYV | xxIAMV |
| xxIAVV | xxITIV | xxINIV | xxVVIV | xxVVIC | xxVVII | xxVVIF | xxVVIL | xxVVYI | xxVVIV |
| xxVVIM | xxVVIA | xxVVIT | xxVVIS | xxVVIH | xxVVIN | xxVVIQ | xxVVIK | xxVVIG | xxVVWV |
| xxVVWC | xxVVWI | xxVVWF | xxVVWL | xxVVWY | xxVVWV | xxVVWM | xxVVWA | xxVVVW | xxVVWS |
| xxVVWH | xxVVFV | xxVVFC | xxVVFI | xxVVFV | xxVVFL | xxVVFY | xxVVFV | xxVVFM | xxVVFA |
| xxVVFT | xxVVFS | xxVVFH | xxVVCV | xxVVCC | xxVVCI | xxVVCF | xxVVCL | xxVVCY | xxVVCV |
| xxVVCM | xxVVCA | xxVVCT | xxVVCS | xxVVYV | xxVVYC | xxVVYI | xxVVYV | xxVVYL | xxVVYY |
| xxVVYV | xxVVYM | xxVVYA | xxVVMV | xxVVMC | xxVVMI | xxVVMF | xxVVML | xxVVMY | xxVVMM |
| xxVVMM | xxVVVV | xxVVVC | xxVVVI | xxVVVF | xxVVVL | xxVVVY | xxVVVW | xxVVVM | xxVVLV |
| xxVVLC | xxVVLI | xxVVLF | xxVVLL | xxVVLY | xxVVLV | xxVVLM | xxVVGV | xxVVGC | xxVVGI |
| xxVVGF | xxVVHV | xxVVHC | xxVVTV | xxVVIW | xxVVIC | xxVVII | xxVVIW | xxVVIW | xxVVIW |
| xxVVIW | xxVIIM | xxVIIA | xxVIIT | xxVIIS | xxVVIH | xxVIWV | xxVIWC | xxVIWI | xxVIWF |
| xxVIWL | xxVIWY | xxVIWW | xxVIWM | xxVIWA | xxVIWT | xxVIWS | xxVIVF | xxVIVF | xxVIFI |
| xxVIFV | xxVIFL | xxVIFY | xxVIFW | xxVIFM | xxVIFA | xxVICV | xxVICC | xxVICI | xxVICF |
| xxVICL | xxVICY | xxVICW | xxVICM | xxVIYV | xxVIYC | xxVIYI | xxVIYF | xxVIYL | xxVIYV |
| xxVIYV | xxVIMV | xxVIMC | xxVIMI | xxVIMF | xxVIML | xxVIMY | xxVIMW | xxVIVV | xxVIVC |
| xxVIVI | xxVIVF | xxVIVL | xxVIVY | xxVIVW | xxVILV | xxVILC | xxVILI | xxVILF | xxVILL |
| xxVIGV | xxVIGC | xxVIHV | xxVLIW | xxVLIC | xxVLIH | xxVLIF | xxVLIH | xxVLIW | xxVLIW |
| xxVLIM | xxVLIA | xxVLIT | xxVLIS | xxVLWV | xxVLWC | xxVLWI | xxVLWF | xxVLWL | xxVLWY |
| xxVLWV | xxVLWM | xxVLVW | xxVLFC | xxVLFI | xxVLFF | xxVLFL | xxVLFY | xxVLFW | xxVLCV |
| xxVLCC | xxVLCT | xxVLCF | xxVLYV | xxVLYC | xxVLYI | xxVLYF | xxVLMV | xxVLMC | xxVLMI |
| xxVLMF | xxVLVW | xxVLVC | xxVLVI | xxVLVF | xxVLLV | xxVLLC | xxVLLI | xxVLGV | xxVLFV |
| xxVVIC | xxVFII | xxVFIF | xxVFIL | xxVFIV | xxVFIV | xxVFWV | xxVFWC | xxVFWI | xxVFWF |
| xxVFFV | xxVFFC | xxVFFI | xxVFCV | xxVFCC | xxVFYV | xxVFYC | xxVFMV | xxVFMV | xxVFLV |
| xxVFCV | xxVFCI | xxVCCI | xxVCFV | xxVCLL | xxVCIY | xxVCWV | xxVCWC | xxVCWI | xxVCFV |
| xxVCFV | xxVCFI | xxVCCV | xxVCYV | xxVCMV | xxVCCV | xxVCLV | xxVWIV | xxVWIC | xxVWII |
| xxVWIF | xxVWIL | xxVWVW | xxVWVC | xxVWVI | xxVWFV | xxVWFC | xxVWCV | xxVWVY | xxVWVY |
| xxVWVY | xxVYIV | xxVYIC | xxVYII | xxVYIF | xxVYIL | xxVYVW | xxVYWC | xxVYWI | xxVYFV |
| xxVYFC | xxVYCV | xxVYVY | xxVYMV | xxVYVY | xxVMIV | xxVMIC | xxVMII | xxVMWV | xxVMWC |
| xxVMFV | xxVMCV | xxVAIV | xxVAIC | xxVAWV | xxFVIV | xxFVIC | xxFVII | xxFVIF | xxFVIL |
| xxFVIY | xxFVIW | xxFVIM | xxFVWV | xxFVWC | xxFVWI | xxFVWF | xxFVWL | xxFVWY | xxFVWV |
| xxFVFC | xxFVFI | xxFVFF | xxFVCV | xxFVCC | xxFVCI | xxFVYV | xxFVYV | xxFVYI | xxFVMV |
| xxFVMC | xxFVVV | xxFVVC | xxFVLV | xxFIIV | xxFIIC | xxFIII | xxFIIY | xxFIIW | xxFIIY |
| xxFIWV | xxFIWC | xxFIWI | xxFIFV | xxFIFC | xxFIFI | xxFICV | xxFIIY | xxFIMV | xxFIVV |
| xxFILV | xxFLIV | xxFLIC | xxFLII | xxFLWV | xxFLFV | xxFFIV | xxFCIV | xxFWIV | xxCVIV |
| xxCVIC | xxCVII | xxCVIF | xxCVIL | xxCVIY | xxCVIW | xxCVWV | xxCVWC | xxCVWI | xxCVWF |
| xxCVFV | xxCVFC | xxCVFI | xxCVFF | xxCVCV | xxCVCC | xxCVYV | xxCVYC | xxCMVY | xxCMVC |
| xxCVVV | xxCVVC | xxCVLV | xxCIVV | xxCIIC | xxCIII | xxCIIF | xxCIWV | xxCIWC | xxCIVI |
| xxCIFV | xxCICV | xxCICV | xxCIYV | xxCIMV | xxCIVV | xxCLIV | xxCLIC | xxCLWV | xxCLFV |
| xxCFIV | xxLVIV | xxLVIC | xxLVII | xxLVIF | xxLVIL | xxLVYI | xxLVIW | xxLVWV | xxLVWC |
| xxLVWI | xxLVWF | xxLVFV | xxLVFC | xxLVFI | xxLVCC | xxLVYV | xxLVYV | xxLVYV | xxLVMV |
| xxLVVY | xxLVLV | xxLVIV | xxLVIC | xxLVII | xxLVIF | xxLVIV | xxLVWC | xxLVFV | xxLVFC |
| xxLICV | xxLIYV | xxLIMV | xxLIVV | xxLLIV | xxLLIC | xxLLWV | xxLLFV | xxLPIV | xxMVIY |
| xxMVIC | xxMVII | xxMVIF | xxMVWV | xxMVWC | xxMVFV | xxMVFC | xxMVCV | xxMVYV | xxMVMV |
| xxMVVY | xxMIVV | xxMIIC | xxMIWV | xxMIFV | xxMLIV | xxWVIV | xxWVIC | xxWVWV | xxWVII |
| xxYVIV |        |        |        |        |        |        |        |        |        |

---
